# Supplementary material for: Synthesis and crystal structure of two synthetic oxofluoride framework compounds – Co2TeO3F2 and Co2SeO3F2
Source: Royal Society of Chemistry journal article supplement (doi:10.1039/c2dt31188g), 2012-01-01
Supplement: c2dt31188g.pdf [file c2dt31188g.pdf]

## Supplementary material

### Synthesis and crystal structure of two synthetic oxofluoride framework compounds – $\text{Co}_2\text{TeO}_3\text{F}_2$ and $\text{Co}_2\text{SeO}_3\text{F}_2$

Shichao Hu and Mats Johnsson

Department of Materials and Environmental Chemistry, Stockholm University, SE-106 91 Stockholm, Sweden

**Table S1-1**

Atomic coordinates and Equivalent Isotropic Displacement Parameters ( $\text{\AA}^2$ ) for  $\text{Co}_2\text{TeF}_2\text{O}_3$ .

| Atom  | <i>X</i>    | <i>Y</i>      | <i>z</i>    | <i>U</i> (eq) |
|-------|-------------|---------------|-------------|---------------|
| Te(1) | 0.69889(7)  | $\frac{1}{4}$ | 0.18293(9)  | 0.00634(16)   |
| Co(1) | 0.58538(10) | 0.56678(7)    | 0.24427(13) | 0.0070(2)     |
| F(1)  | 0.6619(4)   | 0.4566(3)     | 0.5749(6)   | 0.0119(7)     |
| O(1)  | 0.6487(7)   | $\frac{3}{4}$ | 0.3931(11)  | 0.0108(12)    |
| O(2)  | 0.5410(5)   | 0.3830(4)     | 0.0861(7)   | 0.0082(8)     |

**Table S1-2**

Atomic coordinates and Equivalent Isotropic Displacement Parameters ( $\text{\AA}^2$ ) for  $\text{Co}_2\text{SeF}_2\text{O}_3$ .

| Atom  | <i>X</i>    | <i>Y</i>      | <i>z</i>   | <i>U</i> (eq) |
|-------|-------------|---------------|------------|---------------|
| Se(1) | 0.68383(15) | $\frac{1}{4}$ | 0.1481(2)  | 0.0111(3)     |
| Co(1) | 0.59148(13) | 0.56454(10)   | 0.2482(2)  | 0.0077(3)     |
| F(1)  | 0.6600(5)   | 0.4535(5)     | 0.5746(7)  | 0.0138(10)    |
| O(1)  | 0.6645(10)  | $\frac{3}{4}$ | 0.3949(11) | 0.0097(17)    |
| O(2)  | 0.5419(6)   | 0.3786(5)     | 0.0770(9)  | 0.0070(12)    |

*Note.* *U*(eq) is defined as one third of the trace of the orthogonalized  $U_{ij}$  tensor.

**Table S2-1**

Selected Bond Lengths (Å) and Angles (°) for Co<sub>2</sub>TeF<sub>2</sub>O<sub>3</sub>.

|                                         |            |                                        |            |
|-----------------------------------------|------------|----------------------------------------|------------|
| Te1—O2 <sup>i</sup>                     | 1.860(4)   | Co1—F1 <sup>ii</sup>                   | 2.084(3)   |
| Te1—O2                                  | 1.860(4)   | Co1—F1                                 | 2.157(3)   |
| Te1—O1 <sup>ii</sup>                    | 1.904(6)   | F1—Co1 <sup>iv</sup>                   | 2.075(3)   |
| Co1—O2 <sup>iii</sup>                   | 2.049(4)   | F1—Co1 <sup>v</sup>                    | 2.084(3)   |
| Co1—F1 <sup>iv</sup>                    | 2.075(3)   | O1—Te1 <sup>v</sup>                    | 1.904(6)   |
| Co1—O2                                  | 2.078(4)   | O1—Co1 <sup>vi</sup>                   | 2.081(3)   |
| Co1—O1                                  | 2.081(3)   | O2—Co1 <sup>iii</sup>                  |            |
| O2 <sup>i</sup> —Te1—O2                 | 93.59(17)  | F1 <sup>iv</sup> —Co1—F1               | 78.18(12)  |
| O2 <sup>i</sup> —Te1—O1 <sup>ii</sup>   | 98.48(11)  | O2—Co1—F1                              | 84.25(14)  |
| O2—Te1—O1 <sup>ii</sup>                 | 98.48(11)  | O1—Co1—F1                              | 95.76(9)   |
| O2 <sup>iii</sup> —Co1—F1 <sup>iv</sup> | 91.33(14)  | F1 <sup>ii</sup> —Co1—F1               | 93.22(12)  |
| O2 <sup>iii</sup> —Co1—O2               | 78.97(15)  | Co1 <sup>iv</sup> —F1—Co1 <sup>v</sup> | 125.10(15) |
| F1 <sup>iv</sup> —Co1—O2                | 86.80(14)  | Co1 <sup>iv</sup> —F1—Co1              | 101.82(13) |
| O2 <sup>iii</sup> —Co1—O1               | 101.66(12) | Co1 <sup>v</sup> —F1—Co1               | 130.10(15) |
| F1 <sup>iv</sup> —Co1—O1                | 97.21(9)   | Te1 <sup>v</sup> —O1—Co1               | 116.02(2)  |
| O2—Co1—O1                               | 175.91(12) | Te1 <sup>v</sup> —O1—Co1 <sup>vi</sup> | 116.02(2)  |
| O2 <sup>iii</sup> —Co1—F1 <sup>ii</sup> | 93.89(14)  | Co1—O1—Co1 <sup>vi</sup>               | 127.70(3)  |
| F1 <sup>iv</sup> —Co1—F1 <sup>ii</sup>  | 166.69(12) | Te1—O2—Co1 <sup>iii</sup>              | 134.68(21) |
| O2—Co1—F1 <sup>ii</sup>                 | 82.19(14)  | Te1—O2—Co1                             | 116.54(20) |
| O1—Co1—F1 <sup>ii</sup>                 | 93.73(9)   | Co1 <sup>iii</sup> —O2—Co1             | 101.03(16) |
| O2 <sup>iii</sup> —Co1—F1               | 160.69(14) |                                        |            |

**Table S2-2**

Selected Bond Lengths (Å) and Angles (°) for Co<sub>2</sub>SeF<sub>2</sub>O<sub>3</sub>.

|                                         |            |                                        |            |
|-----------------------------------------|------------|----------------------------------------|------------|
| Se1—O2 <sup>i</sup>                     | 1.692(5)   | Co1—F1 <sup>ii</sup>                   | 2.039(4)   |
| Se1—O2                                  | 1.692(5)   | Co1—F1                                 | 2.130(4)   |
| Se1—O1 <sup>ii</sup>                    | 1.747(7)   | F1—Co1 <sup>iv</sup>                   | 2.067(4)   |
| Co1—O2 <sup>iii</sup>                   | 2.073(5)   | F1—Co1 <sup>v</sup>                    | 2.039(4)   |
| Co1—F1 <sup>iv</sup>                    | 2.067(4)   | O1—Se1 <sup>v</sup>                    | 1.747(7)   |
| Co1—O2                                  | 2.105(5)   | O1—Co1 <sup>vi</sup>                   | 2.083(3)   |
| Co1—O1                                  | 2.083(3)   | O2—Co1 <sup>iii</sup>                  | 2.073(5)   |
|                                         |            |                                        |            |
| O2 <sup>i</sup> —Se1—O2                 | 98.96(23)  | F1 <sup>iv</sup> —Co1—F1               | 77.54(15)  |
| O2 <sup>i</sup> —Se1—O1 <sup>ii</sup>   | 102.10(16) | O2—Co1—F1                              | 86.39(19)  |
| O2—Se1—O1 <sup>ii</sup>                 | 102.10(16) | O1—Co1—F1                              | 95.46(13)  |
| O2 <sup>iii</sup> —Co1—F1 <sup>iv</sup> | 89.80(17)  | F1 <sup>ii</sup> —Co1—F1               | 96.96(15)  |
| O2 <sup>iii</sup> —Co1—O2               | 78.24(19)  | Co1 <sup>iv</sup> —F1—Co1 <sup>v</sup> | 124.45(18) |
| F1 <sup>iv</sup> —Co1—O2                | 88.38(18)  | Co1 <sup>iv</sup> —F1—Co1              | 102.46(17) |
| O2 <sup>iii</sup> —Co1—O1               | 101.06(14) | Co1 <sup>v</sup> —F1—Co1               | 128.86(19) |
| F1 <sup>iv</sup> —Co1—O1                | 97.45(13)  | Se1 <sup>v</sup> —O1—Co1               | 116.96(3)  |
| O2—Co1—O1                               | 174.14(15) | Se1 <sup>v</sup> —O1—Co1 <sup>vi</sup> | 116.96(3)  |
| O2 <sup>iii</sup> —Co1—F1 <sup>ii</sup> | 93.16(17)  | Co1—O1—Co1 <sup>vi</sup>               | 125.85(4)  |
| F1 <sup>iv</sup> —Co1—F1 <sup>ii</sup>  | 169.91(15) | Se1—O2—Co1 <sup>iii</sup>              | 133.05(27) |
| O2—Co1—F1 <sup>ii</sup>                 | 82.80(18)  | Se1—O2—Co1                             | 117.99(26) |
| O1—Co1—F1 <sup>ii</sup>                 | 91.45(14)  | Co1 <sup>iii</sup> —O2—Co1             | 101.76(21) |
| O2 <sup>iii</sup> —Co1—F1               | 160.39(18) |                                        |            |

*Note.* Symmetry transformations used to generate equivalent atoms:

- (i) x, 0.5-y, z; (ii) 1.5-x, 1-y, -0.5+z; (iii) 1-x, 1-y, -z; (iv) 1-x, 1-y, 1-z;  
 (v) 1.5-x, 1-y, 0.5+z; (vi) x, 1.5-y, z.

**Table S3-1**

Results from Bond Valence Sum (BVS) calculations of  $\text{Co}_2\text{TeF}_2\text{O}_3$ .

| <u>Atoms</u>          | <u>Bonding distance</u> | <u>Bond valence</u> | <u>Atoms</u>          | <u>Bonding distance</u> | <u>Bond valence</u> |
|-----------------------|-------------------------|---------------------|-----------------------|-------------------------|---------------------|
| Te1—O1 <sup>ii</sup>  | 1.904(5)                | 1.2                 | O1—Co1                | 2.081(3)                | 0.35                |
| Te1—O2                | 1.860(3)                | 1.4                 | O1—Co1 <sup>vi</sup>  | 2.081(3)                | 0.35                |
| Te1—O2 <sup>i</sup>   | 1.860(3)                | 1.4                 | O1—Te1 <sup>v</sup>   | 1.904(5)                | 1.20                |
|                       |                         | <b>4.0</b>          |                       |                         | <b>1.9</b>          |
| Co1—O1                | 2.081(3)                | 0.35                | O2—Co1                | 2.049(4)                | 0.35                |
| Co1—O2 <sup>iii</sup> | 2.049(4)                | 0.38                | O2—Co1 <sup>iii</sup> | 2.049(4)                | 0.35                |
| Co1—O2                | 2.078(3)                | 0.35                | O2—Te1                | 1.860(3)                | 1.30                |
| Co1—F1 <sup>iv</sup>  | 2.075(3)                | 0.31                |                       |                         | <b>2.0</b>          |
| Co1—F1 <sup>ii</sup>  | 2.084(3)                | 0.30                | F1—Co1 <sup>iv</sup>  | 2.075(3)                | 0.30                |
| Co1—F1                | 2.157(3)                | 0.25                | F1—Co1 <sup>v</sup>   | 2.084(3)                | 0.30                |
|                       |                         | <b>1.9</b>          | F1—Co1                | 2.157(3)                | 0.25                |
|                       |                         |                     |                       |                         | <b>0.85</b>         |

**Table S3-2**

Results from Bond Valence Sum (BVS) calculations of  $\text{Co}_2\text{SeF}_2\text{O}_3$ .

| <u>Atoms</u>          | <u>Bonding distance</u> | <u>Bond valence</u> | <u>Atoms</u>          | <u>Bonding distance</u> | <u>Bond valence</u> |
|-----------------------|-------------------------|---------------------|-----------------------|-------------------------|---------------------|
| Se1—O1 <sup>ii</sup>  | 1.747(7)                | 1.2                 | O1—Co1                | 2.083(3)                | 0.35                |
| Se1—O2                | 1.692(5)                | 1.2                 | O1—Co1 <sup>vi</sup>  | 2.083(3)                | 0.36                |
| Se1—O2 <sup>i</sup>   | 1.692(5)                | 1.3                 | O1—Se1 <sup>v</sup>   | 1.747(7)                | 1.19                |
|                       |                         | <b>3.7</b>          |                       |                         | <b>1.9</b>          |
| Co1—O1                | 2.083(3)                | 0.35                | O2—Co1                | 2.105(5)                | 0.33                |
| Co1—O2 <sup>iii</sup> | 2.073(5)                | 0.36                | O2—Co1 <sup>iii</sup> | 2.073(5)                | 0.36                |
| Co1—O2                | 2.105(5)                | 0.33                | O2—Se1                | 1.692(5)                | 1.38                |
| Co1—F1 <sup>iv</sup>  | 2.067(4)                | 0.27                |                       |                         | <b>2.0</b>          |
| Co1—F1 <sup>ii</sup>  | 2.039(4)                | 0.34                | F1—Co1 <sup>iv</sup>  | 2.067(4)                | 0.32                |
| Co1—F1                | 2.130(4)                | 0.32                | F1—Co1 <sup>v</sup>   | 2.039(4)                | 0.34                |
|                       |                         | <b>1.97</b>         | F1—Co1                | 2.130(4)                | 0.27                |
|                       |                         |                     |                       |                         | <b>0.93</b>         |

*Note.* All the calculation were made using following  $R_0$  values: 1.977 for Te—O bonds <sup>[A]</sup>, 1.811 for Se—O bonds <sup>[A]</sup>, 1.692 for Co—O bonds <sup>[A]</sup> and 1.640 for Co—F bonds <sup>[B]</sup>.

Symmetry transformations used to generate equivalent atoms:

- (i)  $x, 0.5-y, z$ ; (ii)  $1.5-x, 1-y, -0.5+z$ ; (iii)  $1-x, 1-y, -z$ ; (iv)  $1-x, 1-y, 1-z$ ;  
 (v)  $1.5-x, 1-y, 0.5+z$ ; (vi)  $x, 1.5-y, z$ .

### References

- [A] I.D. Brown and D. Altermatt, *Acta Cryst.* B41 (1985) 244-247.  
[B] N.E. Brese and M. O'Keeffe, *Acta Cryst.* B47 (1991) 192-197.
